# Supplementary material
Source: PubMed Central journal article supplement (PMC7155946)
Supplement: NIHMS1575962-supplement-Supplementary_material.pdf [file NIHMS1575962-supplement-Supplementary_material.pdf]

## Supplementary Material

**CRE isolates.** Only the first CRE isolate was included from each patient except for one patient with two strains on presentation. Isolates were identified by biochemical testing and matrix-assisted laser desorption and ionization time-of-flight mass spectrometry (MALDI-TOF) (Bruker Daltonics, Bremen, Germany).

**Genotypic  $\beta$ -lactamase testing.** Isolates were retrospectively screened for plasmid-encoded ESBL and AmpC cephalosporinases using the Check-Points CT 103 XL Check-MDR assay (Wageningen, The Netherlands) per the package instruction. The Check-Points assay detects the following ESBLs: *bla*<sub>CTX-M-1 group</sub>, *bla*<sub>CTX-M-1-like</sub>, *bla*<sub>CTX-M-15-like</sub>, *bla*<sub>CTX-M-32-like</sub>, *bla*<sub>CTX-M-2 group</sub>, *bla*<sub>CTX-M-8, &-25 group</sub>, *bla*<sub>CTX-M-9 group</sub>, *bla*<sub>TEM-types</sub>, *bla*<sub>SHV-types</sub>, *bla*<sub>VEB</sub>, *bla*<sub>PER</sub>, *bla*<sub>BEL</sub>, *bla*<sub>GES</sub>; and the following AmpCs: *bla*<sub>CMY I/MOX</sub>, *bla*<sub>ACC</sub>, *bla*<sub>DHA</sub>, *bla*<sub>ACT/MIR</sub>, *bla*<sub>CMY II</sub>, *bla*<sub>FOX</sub>. Detection of carbapenemase genes was carried out using the Xpert Carba-R cartridge (Cepheid, Sunnyvale, CA), which detects *bla*<sub>KPC</sub>, *bla*<sub>NDM</sub>, *bla*<sub>IMP</sub>, *bla*<sub>VIM</sub> and *bla*<sub>OXA-48 like</sub>; Check-Points assay which detects additionally *bla*<sub>OXA-23 like</sub>, *bla*<sub>OXA-58 like</sub>, *bla*<sub>SPM</sub>, *bla*<sub>GES</sub>, and *bla*<sub>GIM</sub>; and three lab-developed multiplexed PCR assays which detect *bla*<sub>SME</sub>, *bla*<sub>SIM</sub>, *bla*<sub>SPM</sub>, *bla*<sub>GES</sub>, *bla*<sub>IMI</sub>, *bla*<sub>NMC-A</sub>, and *bla*<sub>GIM</sub> (Supplementary Table 1). DNA was extracted by boiling a bacterial colony in molecular-grade water for 10 min. PCR reactions consisted of 2  $\mu$ L of forward and reverse primer to achieve 0.5  $\mu$ M, 5  $\mu$ L of 2 $\times$  FastStart SYBR Green Master mix (Roche Applied Science, Indianapolis, IN), and 3  $\mu$ L of DNA extract. The reactions were run on a Rotor-Gene 6000 real-time cycler (Qiagen, Germantown, MD) with following cycling parameters:

95°C for 5 min and 40 cycles of 95°C for 15 sec, 60°C for 30 sec, and 72°C for 30 sec, followed by melting with ramping from 60°C to 95°C in 0.2°C increments. Melting curve analysis was performed to identify the amplicons (Supplementary Table 1). Positive controls for each carbapenemase included *bla*<sub>SME</sub>-positive *S. marcescens* MBRL055 and *bla*<sub>IMI</sub>-positive *Enterobacter cloacae* MBRL1077 provided by the Mayo Clinic (Rochester, MN); *bla*<sub>SIM</sub>-positive *Acinetobacter baumannii* YMC 03/9/T104 provided by Yonsei University College of Medicine (Seoul, South Korea); *bla*<sub>GIM</sub>-positive *E. cloacae* M15 provided by Heinrich Heine University Düsseldorf (Düsseldorf, Germany); *bla*<sub>NMC-A</sub>-positive *E. cloacae* and *bla*<sub>GES</sub>-positive *A. baumannii* provided by JMI Laboratories (North Liberty, IA); and 5 *bla*<sub>GES</sub>-positive and 5 *bla*<sub>SPM</sub>-positive *Pseudomonas aeruginosa* isolates provided by Merck (Schaumburg, IL).

**Porin protein expression.** Levels of OmpC and OmpF in *E. coli* and their analogs in other species were measured using mass spectrometry (MS). Isolates were cultured overnight in 20 mL of LB broth shaking at 250 revolutions per min at 37°C. Bacterial pellets were washed in sodium phosphate buffer (SPB) and resuspended in 0.5 mL of SPB and transferred to O-ring tubes containing 0.2 mL of 0.1-mm zirconia/silica beads. Bacteria were mechanically disrupted with three 0.5-min pulses at 2,500 oscillations per min in a Mini-BeadBeater-1 (BioSpec Products, Bartlesville, OK) with 1-min intervals on ice. The lysates were sedimented two times for 10 min at 1,500 × g to remove cellular debris. To enrich for membrane proteins, the supernatants were sedimented two times for 30 min each at 21,000 × g and the second pellet was resuspended in 45 µL of SPB. Protein concentrations were measured using the Quick Start™ Bradford Protein Assay

(Bio Rad, Hercules, CA) and 20  $\mu\text{g}$  was separated on a 10% SDS-PAGE gel. Gels were stained with Coomassie Brilliant Blue R-250 and protein bands with molecular weight between 31 and 40 kDa were cut and digested with in-gel tryptic digestion kit (Thermo Scientific, Waltham, MA) per the package insert. Samples were concentrated in thermo savant iss110 speedvac system (Thermo Scientific) and resuspended in 20  $\mu\text{L}$  of 0.1% formic acid in LC-MS grade water. Tryptic peptides (2  $\mu\text{L}$  for each sample) were injected with a nanoAcquity sample manager (Waters, Milford, MA), trapped for 1 min at 15  $\mu\text{L}/\text{min}$  on a Symmetry trap column (Waters), and separated on a 1.7  $\mu\text{m}$  particle size BEH C18 column (Waters) by reversed phase LC using a nanoAcquity binary solvent manager (Waters). A 30 min linear acetonitrile gradient (3–35%) was applied. Peptides were ionized by nano-ESI using a pico-emitter tip (New Objective, Woburn, MA) and analyzed by an Impact HD UHR-QTOF mass spectrometer (Bruker Daltonics) in data-dependent acquisition mode. The acquisition parameters and batch processing conditions used for DDA have been previously reported (Kultz et al., 2015). Data was analyzed in PreView (Protein Metrics, San Carlos, CA) using the SwissProt FASTA database entries for *Enterobacteriaceae* ([www.uniprot.org](http://www.uniprot.org)) to determine the dominant post-translational modifications and mass calibration parameters. A more specific search was carried out in Byonic (Protein Metrics, San Carlos, CA) using the TrEMBL database filtered for the taxonomy of the particular organism under study. MS and MS/MS tolerances were respectively set to 10 and 30 ppm. The main modifications considered were cysteine trioxidation, methionine oxidation and N-Term acetylation. The protein false detection rate was set to 1% and all matches with less than 2 unique peptides were discarded. The resulting protein lists were then compiled with an R script (<http://www.R-project.org/>) to

classify the identified porin variants based on homology into OmpC (OmpK36 used for *K. pneumoniae*) and OmpF (OmpK35 for *K. pneumoniae*) categories. The total intensity of all the MS/MS spectra contributing to peptide identification for each category was summed. Fold change in relative porin expression was determined by calculating the ratio of each porin in CRE isolates to averaged expression in four pan-sensitive strains of the same species.

**Porin RNA expression.** Porin RNA expression was performed on the 39 CRE isolates recovered between 2013 and 2015 excluding *S. marcescens* isolates and one *E. cloacae* complex. CRE isolates were cultured in Mueller Hinton broth in the presence of a carbapenem (either meropenem 2 µg/mL or imipenem 2 µg/mL and if necessary ertapenem 1 µg/mL) at a starting density  $1 \times 10^5$  CFU/mL and harvested at  $1 \times 10^8$  CFU/mL. RNAprotect Bacteria Reagent (Qiagen) was added to cultures at a ratio 3:1 and incubated at ambient temperature for 5 min. RNA was extracted from bacterial pellets and DNase-treated using RNA Extraction Kit and RNase-free DNase Kit (Qiagen), respectively. cDNA was constructed using the QuantiTect Reverse Transcription Kit (Qiagen). An identical reaction not treated with reverse transcriptase was included to control for genomic DNA carryover. Quantitative reverse transcription-PCR (qRT-PCR) was performed for porin genes (*ompC* and *ompF* in *E. coli* and their analogs in other species) and the housekeeping gene *rpoB*. qRT-PCR primers are shown in Supplementary Table 2. Expression profiling of *ompF* analog in *E. cloacae* and *Citrobacter freundii* was not performed due to lack of PCR primers. PCR reactions were carried out in 10 µL containing of 0.5 µM of each primer,  $1 \times$  FastStart SYBR Green Master mix, and 3 µL of

cDNA. Amplification conditions were as described above. The specificity of PCR products was confirmed by melting point analysis. The cDNA copy number of each gene was extrapolated from a standard curve prepared using serial 10-fold dilution of genomic DNA from the respective species. Expression of porin genes was normalized to *rpoB* in the same sample. Fold change in porin expression was determined by calculating the ratio of normalized porin expression in CRE isolates to a pan-sensitive control strain of the same species. Each experiment was performed in triplicate, and results were presented as mean value of three experiments. *E. coli* ATCC 25922, *E. cloacae* ATCC 13047, *E. aerogenes* ATCC 13048, *K. pneumoniae* ATCC13883, and *C. freundii* ATCC 8454 were used as negative controls and *K. pneumoniae* isolate #404 (Hong et al., 2013) was used as a positive control for porin down-regulation.

**Whole genome sequencing.** Genomic DNA was extracted from bacterial cultures with the Genra Puregene Yeast/Bact. Kit (Qiagen) per the manufacturer's instructions. Dual-indexed sequencing libraries were prepared using the Nextera XT Sample Prep Kit (Illumina, San Diego CA). Libraries were subjected to 101bp paired-end sequencing on the Illumina HiSeq 4000 platform, to a median coverage of 200X per strain (range 115-278X) (Supplementary Table 6). Sequencing data were demultiplexed by unique barcodes. Reads were deduplicated using SuperDeduper v1.4 with the start location in the read at 5 bp (-s 5) and length 50 (-l 50) (Petersen et al., 2015). Deduplicated reads were then trimmed using TrimGalore v0.4.4, a wrapper for CutAdapt, with a minimum quality score of 30 for trimming (-q 30), minimum read length of 50 (--length 50) and the "--nextera" flag. Preprocessed reads for each isolate were aligned to the RefSeq reference

genome for the respective species using the Burrows-Wheeler Aligner (BWA) v0.7.10 with default parameters. Reference genomes are shown in Supplementary Table 3. Pileup files were generated using Samtools v1.5 (Li et al., 2009), and Varscan v2.3.9 was used to identify single nucleotide variants (SNVs) with at least 40× coverage (--min-coverage 40), 90% frequency (--min-var-freq 0.9), and base quality of at least 20 to support a base call (--min-avg-qual 20), with the strand filter parameter turned off (--strand-filter 0). (Koboldt et al., 2012). Varscan output was parsed with custom scripts to generate a consensus sequence for each sample, requiring at least 0.9 frequency to support a SNP or reference base call. SNVs between strain pairs were counted using custom scripts. To build phylogenetic trees, core genome positions were identified between all strains of a given species. Core genome positions are defined as genome positions where a base call can be made for each input genome. Core SNVs were concatenated into a FASTA file for each sample using custom scripts. Multiple sequence alignments were performed with MAFFT v7.31 with the "--auto" flag, and approximate maximum likelihood phylogenetic trees were computed from the resulting alignments using FastTree v2.1.7 (Kato et al., 2002; Price et al., 2010). Trees were midpoint rooted and visualized with FigTree v1.4.3 (<http://tree.bio.ed.ac.uk/software/figtree/>). An isolate of *E. coli* that was sequenced in two separate runs was analyzed with this pipeline and shown to yield zero SNVs, as one would expect for an identical strain. Genome sequences for CRE isolates were deposited in the NCBI BioSample database (accession numbers SAMN08623777- SAMN08623838)

(<https://www.ncbi.nlm.nih.gov/Traces/study/?acc=SRP133707>).

## References

Clinical and Laboratory Standards Institute. Performance standards for antimicrobial susceptibility testing: twenty-sixth informational supplement. The Institute 2016;M100-S26.

Chea N, Bulens SN, Kongphet-Tran T, Lynfield R, Shaw KM, Vagnone PS et al. Improved Phenotype-Based Definition for Identifying Carbapenemase Producers among Carbapenem-Resistant *Enterobacteriaceae*. *Emerg Infect Dis* 2015;21:1611-1616.

Hong JH, Clancy CJ, Cheng S, Shields RK, Chen L, Doi Y et al. Characterization of porin expression in *Klebsiella pneumoniae* Carbapenemase (KPC)-producing *K. pneumoniae* identifies isolates most susceptible to the combination of colistin and carbapenems. *Antimicrob Agents Chemother* 2013;57:2147-2153.

Katoh K, Misawa K, Kuma K, Miyata T. MAFFT: a novel method for rapid multiple sequence alignment based on fast Fourier transform. *Nucleic Acids Res* 2002;30(14):3059-3066.

Koboldt DC, Zhang Q, Larson DE, Shen D, McLellan MD, Lin L et al. VarScan 2: somatic mutation and copy number alteration discovery in cancer by exome sequencing. *Genome Res* 2012;22:568-576.

Kultz D, Li J, Zhang X, Villarreal F, Pham T, Paguio D. Population-specific plasma proteomes of marine and freshwater three-spined sticklebacks (*Gasterosteus aculeatus*).

Proteomics 2015;15:3980-3992.

Li H, Handsaker B, Wysoker A, Fennell T, Ruan J, Homer N et al. The Sequence Alignment/Map format and SAMtools. Bioinformatics 2009;25:2078-2079.

Petersen KR, Strett DA, Gerritsen AT, Hunter SS, Settles ML. Super Deduper, Fast PCR Duplicate Detection in Fastq Files. Proceedings of the 6th ACM conference on bioinformatics, computational biology and health informatics. 2015. p. 491.

Price MN, Dehal PS, Arkin AP. Approximately Maximum-Likelihood Trees for Large Alignments. PloS one 2010;5:e9490.



**Supplementary Table 1. Carbapenemase gene primers used in this study.**

| Primer Set | Name            | Target Gene             | Sequence                | Amplicon Length (bp) | T <sub>m</sub> (°C) | Concentration (μM) |
|------------|-----------------|-------------------------|-------------------------|----------------------|---------------------|--------------------|
| Reaction 1 | 16S univ 806-F  | 16S rRNA                | ATTAGATACCCTGGTAGTCC    | 319                  | 82                  | 0.25               |
|            | 16S univ 1104-R | 16S rRNA                | TCGTTGCGGGACTTAACC      |                      |                     |                    |
|            | IMI FWD-2       | <i>blaIMI/ blaNMC-A</i> | GCTTTACAATATAGCGACAATGG | 133                  | 73.9                | 0.5                |
|            | IMI REV-2       | <i>blaIMI/ blaNMC-A</i> | GATCTAACTCCCAACGATCGAG  |                      |                     |                    |
|            | SME FWD-2       | <i>blaSME</i>           | ATTTCTTGGCGGTCCTGAG     | 180                  | 76.9                | 0.5                |
|            | SME REV-2       | <i>blaSME</i>           | TTGAGAACATTCCCCAAAGC    |                      |                     |                    |
| Reaction 2 | GIM FWD-3       | <i>blaGIM</i>           | GATCGCACTGCTGGTATCAA    | 186                  | 78.9                | 0.5                |
|            | GIM REV-3       | <i>blaGIM</i>           | ATCCTCTGTATGCCAGCAC     |                      |                     |                    |
|            | SIM FWD-2       | <i>blaSIM</i>           | CAACACATTTCCACGACGAC    | 249                  | 75.3                | 0.5                |
|            | SIM REV-2       | <i>blaSIM</i>           | AGCCCCCGAATAGGATTTTT    |                      |                     |                    |
| Reaction 3 | GES FWD-3       | <i>blaGES</i>           | TCTAGCATCGGGACACATGA    | 164                  | 81.5                | 0.5                |
|            | GES REV-3       | <i>blaGES</i>           | CTTTCCGGTCTAGCCGACTC    |                      |                     |                    |
|            | SPM FWD-1       | <i>blaSPM</i>           | AAAATCTGGGTACGCCAAACG   | 271                  | 79.0                | 0.5                |
|            | SPM REV-1       | <i>blaSPM</i>           | ACATTATCCGCTGGAACAGG    |                      |                     |                    |

16S rRNA was used as internal control for extraction and amplification

**Supplementary Table 2. Quantitative reverse transcription-PCR primers used in this study.**

| Organism                                                                                                        | Name             | Target Gene                    | Sequence                    | Amplicon Length (bp) |
|-----------------------------------------------------------------------------------------------------------------|------------------|--------------------------------|-----------------------------|----------------------|
| <i>E. coli</i> , <i>K. pneumoniae</i> ,<br><i>C. freundii</i> complex                                           | ompC-FWD-02      | <i>OmpC</i> /<br><i>OmpK36</i> | AAGTCGAACTGGTACTGAGCAA      | 98                   |
|                                                                                                                 | ompC-REV-02      |                                | CAGTACACCCAGACCTACAACG      |                      |
| <i>E. aerogenes</i>                                                                                             | ompC-FWD-02      | <i>OmpC</i> analog             | AAGTCGAACTGGTACTGAGCAA      | 98                   |
|                                                                                                                 | ompC-REV-02-Eaer |                                | CAGTACACCCAGACYTACAACG      |                      |
| <i>E. cloacae</i> complex                                                                                       | ompC-FWD-01-Eclo | <i>OmpC</i> analog             | GCRCCMACRTCAACATAYTTCAG     | 123                  |
|                                                                                                                 | ompC-REV-01-Eclo |                                | GGTTGCKCAGTATCAGTTTCGAC     |                      |
| <i>E. coli</i> ,<br><i>C. freundii</i> complex                                                                  | ompF-FWD-06      | <i>OmpF</i>                    | TCTGGCAGCATATCGGTGTA        | 182                  |
|                                                                                                                 | ompF-REV-06      |                                | CGGTTATGGTCAGTGGGAAT        |                      |
| <i>K. pneumoniae</i>                                                                                            | ompF-FWD-07      | <i>OmpK35</i>                  | GAARCCGTCGCCATTCTG          | 179                  |
|                                                                                                                 | ompF-REV-07      |                                | ATGACCGGYCGTACCAAC          |                      |
| <i>E. aerogenes</i>                                                                                             | ompF-FWD-07      | <i>OmpF</i> analog             | GAARCCGTCGCCATTCTG          | 140                  |
|                                                                                                                 | ompF-REV-07-Eaer |                                | ATGACCGGMCGTACCAAC          |                      |
| <i>E. coli</i> , <i>K. pneumoniae</i> ,<br><i>E. aerogenes</i> , <i>C. freundii</i> , <i>E. cloacae</i> complex | rpoB-FWD-01      | <i>rpoB</i>                    | AAGGCGAATCCAGCTTGTTTCAGC*   | 148                  |
|                                                                                                                 | rpoB-REV-01      |                                | TGACGTTGCATGTTTCGCACCCATCA* |                      |

\*Obtained from Hong et al., 2013

**Supplementary Table 3. Reference genomes used for phylogenetic analysis.**

| Species                             | Reference genome                                              | NCBI Nucleotide accession |
|-------------------------------------|---------------------------------------------------------------|---------------------------|
| <i>Citrobacter freundii</i> complex | <i>Citrobacter freundii</i> CFNIH1                            | NZ_CP007557.1             |
| <i>Enterobacter aerogenes</i>       | <i>Enterobacter aerogenes</i> KCTC 2190                       | NC_015663.1               |
| <i>Enterobacter cloacae</i> complex | <i>Enterobacter cloacae</i> subsp. <i>cloacae</i> ATCC 13047  | NC_014121.1               |
| <i>Escherichia coli</i>             | <i>Escherichia coli</i> str. K-12 substr. MG1655              | NC_000913.3               |
| <i>Klebsiella pneumoniae</i>        | <i>Klebsiella pneumoniae</i> subsp. <i>pneumoniae</i> HS11286 | NC_016845.1               |
| <i>Serratia marcescens</i>          | <i>Serratia marcescens</i> subsp. <i>marcescens</i> Db11      | NZ_HG326223.1             |

**Supplementary Table 4. Annual CRE rates at Stanford Health Care.**

| Species                             | No. of CRE/CRE + non-CRE isolates (%) |               |               |               |                |
|-------------------------------------|---------------------------------------|---------------|---------------|---------------|----------------|
|                                     | 2013                                  | 2014          | 2015          | 2016          | 2013-16        |
| <i>Citrobacter freundii</i> complex | 0/120 (0)                             | 2/81 (2.5)    | 0/93 (0)      | 1/108 (0.9)   | 3/402 (0.7)    |
| <i>Enterobacter aerogenes</i>       | 2/122 (1.6)                           | 1/92 (1.1)    | 4/104 (3.8)   | 1/115 (0.9)   | 8/433 (1.8)    |
| <i>Enterobacter cloacae</i> complex | 3/240 (1.3)                           | 0/226 (0)     | 3/239 (1.3)   | 8/289 (2.8)   | 14/994 (1.4)   |
| <i>Escherichia coli</i>             | 1/3117 (0)                            | 4/2080 (0.2)  | 2/3008 (0.1)  | 4/3834 (0.1)  | 11/12039 (0.1) |
| <i>Klebsiella pneumoniae</i>        | 4/631 (0.6)                           | 7/503 (1.4)   | 7/565 (1.2)   | 1/824 (0.1)   | 19/2523 (0.8)  |
| <i>Serratia marcescens</i>          | 1/161 (0.6)                           | 0/113 (0)     | 2/157 (1.3)   | 4/143 (2.8)   | 7/574 (1.2)    |
| All species                         | 11/5001 (0.2)                         | 14/3550 (0.4) | 18/4752 (0.4) | 19/5968 (0.3) | 62/19271 (0.3) |

No CRE isolates were found for *Citrobacter koseri*, *Klebsiella oxytoca*, *Morganella*

*morganii*, *Proteus mirabilis*, *Proteus vulgaris*, or *Salmonella enterica*. Per the CLSI,

imipenem MIC for *Proteus* spp., *Providencia* spp., and *Morganella morganii* tend to be

in the non-susceptible range due to mechanisms other than carbapenemases. Therefore,

imipenem non-susceptibility was not used in CRE rate calculation for these organisms.

## Supplementary Table 5. Genotypic and phenotypic antibiotic susceptibility testing results and relative porin expression of CRE isolates in this study.

| Isolate ID No. | Species                    | Carbapenemase gene               | Carbapenemase activity by mCIM | ESBL/pAmpC                            | Porin Protein Quantitation* |                |                |                | RNA Porin Expression* |                       |                       |                           | MIC (µg/ml)                        |                               |                                |  |  |
|----------------|----------------------------|----------------------------------|--------------------------------|---------------------------------------|-----------------------------|----------------|----------------|----------------|-----------------------|-----------------------|-----------------------|---------------------------|------------------------------------|-------------------------------|--------------------------------|--|--|
|                |                            |                                  |                                |                                       | OmpC or analog              | OmpF or analog | ompC or analog | ompF or analog | Imipenem (MicroScan)  | Meropenem (MicroScan) | Ertapenem (MicroScan) | Imipenem-Relabactam (BMD) | Meropenem-Vaborbactam (test strip) | Ceftazidime-Avibactam (Etest) | Ceftolozane-Tazobactam (Etest) |  |  |
| CRE01          | <i>E. coli</i>             | Negative                         | Negative                       | CTX-M group (1, type-15 like)         | 0↓                          | 0↓             | 0.22↓          | 0.05↓          | 4-R                   | 8-R                   | >4-R                  | 0.5-5                     | 2-5                                | 1-5                           | 128-R                          |  |  |
| CRE02          | <i>E. cloacae</i> complex  | <i>bla<sub>IMP</sub></i>         | Positive                       | SHV (2385+240K)                       | 1.82=                       | 0.1↓           | 4.11↑          | ND             | ≤1-5                  | 4-R                   | >4-R                  | 0.5-5                     | 8-I                                | 32-R                          | ≥256-R                         |  |  |
| CRE03          | <i>E. aerogenes</i>        | Negative                         | Negative                       | Negative                              | 0↓                          | 0.7=           | 6.52↑          | 0.76=          | 2-I                   | ≤1-5                  | 2-R                   | 0.25-5                    | 0.12-5                             | 1-5                           | 2-5                            |  |  |
| CRE04          | <i>K. pneumoniae</i>       | Negative                         | Negative                       | CTX-M group (1, type-15 like)         | 0.09↓                       | 0↓             | 8.94↑          | 0.01↓          | 4-R                   | 8-R                   | >4-R                  | 0.5-5                     | 4-5                                | 4-5                           | ≥256-R                         |  |  |
| CRE05          | <i>S. marcescens</i>       | Negative                         | Negative                       | Negative                              | 1.68=                       | 0.5=           | ND             | ND             | >8-R                  | ≤1-5                  | ≤0.5-5                | 4-R                       | 0.25-5                             | 2-5                           | 4-I                            |  |  |
| CRE06          | <i>E. cloacae</i> complex  | Negative                         | Negative                       | ACT/MIR                               | 0↓                          | 2.02=          | ND             | ND             | ≤1-5                  | ≤1-5                  | 4-R                   | 0.25-5                    | 0.5-5                              | 2-5                           | 32-R                           |  |  |
| CRE07          | <i>K. pneumoniae</i>       | <i>bla<sub>OXA-48-like</sub></i> | Positive                       | CTX-M group (1, type-15 like)         | 0.33↓                       | 0.23↓          | 0.67=          | 1.36=          | 2-I                   | ≤1-5                  | 4-R                   | 1-5                       | 4-5                                | 0.25-5                        | 4-I                            |  |  |
| CRE08          | <i>K. pneumoniae</i>       | <i>bla<sub>OXA-48-like</sub></i> | Positive                       | CTX-M group (1, type-15 like)         | 0.49↓                       | 0↓             | 2.07↑          | 1.27=          | ≤1-5                  | ≤1-5                  | >4-R                  | 1-5                       | 1-5                                | 1-5                           | 32-R                           |  |  |
| CRE09          | <i>E. aerogenes</i>        | Negative                         | Negative                       | Negative                              | 0↓                          | 0.01↓          | 0.14↓          | 0.04↓          | >8-R                  | >8-R                  | >4-R                  | 8-R                       | 16-R                               | 4-5                           | 16-R                           |  |  |
| CRE10          | <i>K. pneumoniae</i>       | <i>bla<sub>OXA-48-like</sub></i> | Positive                       | CTX-M group (1, type-15 like)         | 0↓                          | 0.04↓          | 0.27↓          | 1.71=          | 4-R                   | 2-I                   | >4-R                  | 8-R                       | 16-R                               | 1-5                           | 32-R                           |  |  |
| CRE11          | <i>E. cloacae</i> complex  | Negative                         | Negative                       | ACT/MIR                               | 0.26↓                       | 3↑             | 0.38↓          | ND             | 2-I                   | 4-R                   | >4-R                  | 0.25-5                    | 1-5                                | 2-5                           | 32-R                           |  |  |
| CRE12          | <i>K. pneumoniae</i>       | <i>bla<sub>IMP</sub></i>         | Positive                       | DHA, CTX-M group (1, type-15 like)    | 0.03↓                       | 0↓             | 7.95↑          | 1.45=          | ≤1-5                  | >8-R                  | >4-R                  | 0.5-5                     | 16-R                               | ≥256-R                        | ≥256-R                         |  |  |
| CRE13          | <i>K. pneumoniae</i>       | <i>bla<sub>IMP</sub></i>         | Positive                       | SHV (2385+240K)                       | 1.38=                       | 0↓             | 23.28↑         | 1.53=          | >8-R                  | >8-R                  | >4-R                  | 0.5-5                     | 0.5-5                              | 4-5                           | 64-R                           |  |  |
| CRE14          | <i>E. coli</i>             | <i>bla<sub>OXA-48-like</sub></i> | Positive                       | CMY-II                                | 1.35=                       | 0.34↓          | 7.56↑          | 50.61↑         | ≤1-5                  | ≤1-5                  | ≤1-5                  | 0.5-5                     | 1-5                                | 0.5-5                         | 32-R                           |  |  |
| CRE15          | <i>E. coli</i>             | Negative                         | Negative                       | CTX-M group (1, type-15 like)         | 0↓                          | 0↓             | 0.03↓          | 162.56↑        | >8-R                  | >8-R                  | >4-R                  | 8-R                       | 8-I                                | 2-5                           | 64-R                           |  |  |
| CRE16          | <i>E. coli</i>             | <i>bla<sub>OXA-48-like</sub></i> | Positive                       | CTX-M9                                | 0.36↓                       | 0.03↓          | 4.28↑          | 0.06↓          | ≤1-5                  | ≤1-5                  | 4-R                   | 0.5-5                     | 4-5                                | 1-5                           | 4-I                            |  |  |
| CRE17          | <i>E. coli</i>             | <i>bla<sub>NDM</sub></i>         | Positive                       | CTX-M group (1, type-15 like)         | 0.88=                       | 0↓             | 1.64=          | 0.11↓          | >8-R                  | >8-R                  | >4-R                  | 64-R                      | ≥256-R                             | ≥256-R                        | ≥256-R                         |  |  |
| CRE18          | <i>K. pneumoniae</i>       | <i>bla<sub>NDM</sub></i>         | Positive                       | Negative                              | 0.17↓                       | 0↓             | 0.28↓          | 0.33↓          | 8-R                   | >8-R                  | >4-R                  | 8-R                       | 32-R                               | ≥256-R                        | ≥256-R                         |  |  |
| CRE20*         | <i>C. freundii</i> complex | Negative                         | Negative                       | Negative                              | 1.43=                       | 0.45↓          | 18.10↑         | ND             | ≤1-5                  | ≤1-5                  | ≤0.5-5                | 0.5-5                     | 0.5-5                              | 0.5-5                         | 64-R                           |  |  |
| CRE21*         | <i>C. freundii</i> complex | Negative                         | Negative                       | Negative                              | 4.37↑                       | 1.45=          | 59↑            | ND             | 2-I                   | ≤1-5                  | 4-R                   | 0.5-5                     | 2-5                                | 1-5                           | 8-R                            |  |  |
| CRE22          | <i>K. pneumoniae</i>       | Negative                         | Negative                       | CTX-M group (1, type-15 like)         | 0.02↓                       | 0↓             | 0.4=           | 0.64=          | ≤1-5                  | 4-R                   | >4-R                  | 0.5-5                     | 2-5                                | 1-5                           | 128-R                          |  |  |
| CRE23          | <i>E. aerogenes</i>        | Negative                         | Negative#                      | Negative                              | 0↓                          | 0.01↓          | 0.31↓          | 0.2↓           | >8-R                  | >8-R                  | >4-R                  | 0.5-5                     | 2-5                                | 1-5                           | 2-5                            |  |  |
| CRE24          | <i>K. pneumoniae</i>       | Negative                         | Negative                       | CTX-M group (1, type-15 like)         | 0.05↓                       | 0↓             | 3.02↑          | 0.37↓          | ≤1-5                  | 2-I                   | >4-R                  | 0.5-5                     | 1-5                                | 1-5                           | 2-5                            |  |  |
| CRE25          | <i>K. pneumoniae</i>       | Negative                         | Negative                       | CTX-M group (1, type-15 like)         | 0.03↓                       | 0↓             | 1.35=          | 1.51=          | 4-R                   | >8-R                  | >4-R                  | 4-R                       | 8-I                                | 8-5                           | ≥256-R                         |  |  |
| CRE26          | <i>K. pneumoniae</i>       | <i>bla<sub>OXA-48-like</sub></i> | Positive                       | CTX-M group (1, type-15 like)         | 0.08↓                       | 0↓             | 11.25↑         | 5.88↑          | 2-I                   | >8-R                  | >4-R                  | 4-R                       | 16-R                               | 2-5                           | ≥256-R                         |  |  |
| CRE27          | <i>E. aerogenes</i>        | Negative                         | Negative#                      | Negative                              | 0↓                          | 0.01↓          | 0.49↓          | 0.08↓          | 2-I                   | 4-R                   | >4-R                  | 1-5                       | 0.25-5                             | 2-5                           | 4-I                            |  |  |
| CRE28          | <i>K. pneumoniae</i>       | <i>bla<sub>NDM</sub></i>         | Positive                       | CTX-M group (1, type-15 like)         | 0.87=                       | 0↓             | 1.85=          | 0.02↓          | >8-R                  | >8-R                  | >4-R                  | 16-R                      | 16-R                               | ≥256-R                        | ≥256-R                         |  |  |
| CRE30          | <i>K. pneumoniae</i>       | Negative                         | Negative                       | SHV (2385+240K)                       | 0.01↓                       | 0↓             | 0.06↓          | 0.01↓          | 4-R                   | 8-R                   | >4-R                  | 1-5                       | 4-5                                | 1-5                           | 1-5                            |  |  |
| CRE31          | <i>K. pneumoniae</i>       | <i>bla<sub>NDM</sub></i>         | Positive                       | Negative                              | 1.3=                        | 0↓             | 20.92↑         | 1.5=           | 8-R                   | 8-R                   | 4-R                   | 8-R                       | 8-I                                | ≥256-R                        | ≥256-R                         |  |  |
| CRE32          | <i>K. pneumoniae</i>       | Negative                         | Negative                       | CTX-M group (1, type-15 like)         | 0.18↓                       | 0↓             | 0.37↓          | 0.2↓           | ≤1-5                  | 4-R                   | 4-R                   | 0.5-5                     | 1-5                                | 2-5                           | 32-R                           |  |  |
| CRE33          | <i>E. cloacae</i> complex  | Negative                         | Negative                       | ACT/MIR                               | 0.12↓                       | 0↓             | 3.16↑          | ND             | 4-R                   | 4-R                   | >4-R                  | 0.5-5                     | 4-5                                | 2-5                           | 16-R                           |  |  |
| CRE34          | <i>E. cloacae</i> complex  | Negative                         | Negative#                      | ACT/MIR                               | 5.7↑                        | 0.31↓          | 0.71=          | ND             | 2-I                   | ≤1-5                  | ≤0.5-5                | 0.5-5                     | 0.12-5                             | 1-5                           | 4-I                            |  |  |
| CRE35          | <i>S. marcescens</i>       | <i>bla<sub>SHC</sub></i>         | Positive                       | Negative                              | 1.3=                        | 1.53=          | ND             | ND             | >8-R                  | >8-R                  | >4-R                  | 4-R                       | 0.06-5                             | 0.25-5                        | 1-5                            |  |  |
| CRE36          | <i>E. cloacae</i> complex  | <i>bla<sub>IMP</sub></i>         | Positive                       | ACT/MIR; SHV (2385+240K)              | 5.36↑                       | 0.12↓          | 3.19↑          | ND             | 8-R                   | 8-R                   | >4-R                  | 0.5-5                     | 0.12-5                             | 1-5                           | 8-R                            |  |  |
| CRE37          | <i>K. pneumoniae</i>       | <i>bla<sub>IMP</sub></i>         | Positive                       | CTX-M group (CTX-M9); SHV (2385+240K) | 0.09↓                       | 0↓             | 3.41↑          | 6.93↑          | >8-R                  | >8-R                  | >4-R                  | 0.5-5                     | 4-5                                | 2-5                           | 32-R                           |  |  |
| CRE38          | <i>E. aerogenes</i>        | Negative                         | Negative                       | Negative                              | 9.33↑                       | 0.01↓          | 6.96↑          | 0.27↓          | >8-R                  | 8-R                   | >4-R                  | 0.5-5                     | 2-5                                | 2-5                           | 4-I                            |  |  |
| CRE39          | <i>E. aerogenes</i>        | Negative                         | Negative                       | Negative                              | 2.2↑                        | 0↓             | 5.30↑          | 0.6=           | 2-I                   | 4-R                   | >4-R                  | 0.5-5                     | 2-5                                | 2-5                           | 8-R                            |  |  |
| CRE40          | <i>K. pneumoniae</i>       | Negative                         | Negative                       | CTX-M group (1, type-1 like)          | 0.02↓                       | 0↓             | 0.12↓          | 0.05↓          | ≤1-5                  | 4-R                   | >4-R                  | 0.5-5                     | 1-5                                | 0.5-5                         | 8-R                            |  |  |
| CRE41          | <i>E. aerogenes</i>        | Negative                         | Negative                       | Negative                              | 0↓                          | 0↓             | 1.14=          | 0.18↓          | 4-R                   | ≤1-5                  | 1-I                   | 1-5                       | 0.25-5                             | 0.5-5                         | 1-5                            |  |  |
| CRE42          | <i>E. coli</i>             | Negative                         | Negative                       | Negative                              | 0.19↓                       | 0↓             | 9.50↑          | 9.15↑          | ≤1-5                  | 4-R                   | >4-R                  | 0.25-5                    | 4-5                                | 2-5                           | ≥256-R                         |  |  |
| CRE43          | <i>K. pneumoniae</i>       | <i>bla<sub>IMP</sub></i>         | Positive                       | CTX-M group (1, type-15 like)         | 0.31↓                       | 2.1↑           | 14.04↑         | 4.82↑          | 2-I                   | 2-I                   | 1-I                   | 0.25-5                    | 0.06-5                             | 0.25-5                        | 4-I                            |  |  |
| CRE44          | <i>S. marcescens</i>       | Negative                         | Negative                       | Negative                              | 1.33=                       | 0.07↓          | ND             | ND             | >8-R                  | 2-I                   | >4-R                  | 1-5                       | 2-5                                | 2-5                           | 2-5                            |  |  |
| CRE45          | <i>E. coli</i>             | <i>bla<sub>NDM</sub></i>         | Positive                       | CTX-M group (1, type-1 like)          | 0.86=                       | 0↓             | 5.29↑          | 13.01↑         | >8-R                  | >8-R                  | >4-R                  | 4-R                       | 32-R                               | ≥256-R                        | ≥256-R                         |  |  |
| CRE49          | <i>S. marcescens</i>       | <i>bla<sub>SHC</sub></i>         | Positive                       | Negative                              | 0.88=                       | 0.99=          | ND             | ND             | >8-R                  | >8-R                  | >4-R                  | 4-R                       | 0.06-5                             | 0.12-5                        | 0.5-5                          |  |  |
| CRE50          | <i>E. coli</i>             | Negative                         | Negative                       | CTX-M1, type 15-like                  | 0.11↓                       | 0↓             | ND             | ND             | ≤1-5                  | 2-I                   | >4-R                  | 0.25-5                    | 1-5                                | 1-5                           | 2-5                            |  |  |
| CRE54          | <i>E. cloacae</i> complex  | Negative                         | Negative                       | Negative                              | 0.28↓                       | 0.3↓           | ND             | ND             | 2-I                   | ≤1-5                  | 4-R                   | 0.5-5                     | 1-5                                | 2-5                           | 1-5                            |  |  |
| CRE60          | <i>E. coli</i>             | Negative                         | Negative                       | CMY II                                | 0.11↓                       | 0↓             | ND             | ND             | ≤1-5                  | ≤1-5                  | 1-I                   | 0.25-5                    | 0.12-5                             | 1-5                           | 16-R                           |  |  |
| CRE65          | <i>E. cloacae</i> complex  | Negative                         | Negative                       | ACT/MIR                               | 0.14↓                       | 0↓             | ND             | ND             | ≤1-5                  | 4-R                   | >4-R                  | 0.5-5                     | 1-5                                | 2-5                           | 32-R                           |  |  |
| CRE71          | <i>E. cloacae</i> complex  | Negative                         | Negative#                      | Negative                              | 4.69↑                       | 4.22↑          | ND             | ND             | 2-I                   | ≤1-5                  | 1-I                   | 0.5-5                     | 0.25-5                             | 1-5                           | 1-5                            |  |  |
| CRE72          | <i>S. marcescens</i>       | <i>bla<sub>SHC</sub></i>         | Positive                       | Negative                              | 0.15↓                       | 0.01↓          | ND             | ND             | >8-R                  | >8-R                  | >4-R                  | 2-I                       | 0.06-5                             | 0.12-5                        | 0.25-5                         |  |  |
| CRE73          | <i>E. cloacae</i> complex  | <i>bla<sub>IMP</sub></i>         | Positive                       | ACT/MIR                               | 0.06↓                       | 2.22↑          | ND             | ND             | 8-R                   | 8-R                   | >4-R                  | 0.5-5                     | 0.06-5                             | 1-5                           | 4-I                            |  |  |
| CRE74          | <i>E. cloacae</i> complex  | Negative                         | Negative                       | ACT/MIR                               | 0.07↓                       | 0.91=          | ND             | ND             | ≤1-5                  | ≤1-5                  | 2-R                   | 0.5-5                     | 0.25-5                             | 2-5                           | 32-R                           |  |  |
| CRE75          | <i>E. coli</i>             | Negative                         | Negative                       | CTX-M1, type 15-like                  | 0.04↓                       | 0↓             | ND             | ND             | ≤1-5                  | ≤1-5                  | >4-R                  | 0.25-5                    | 1-5                                | 1-5                           | 16-R                           |  |  |
| CRE77          | <i>E. aerogenes</i>        | Negative                         | Negative#                      | Negative                              | 0.5=                        | 0.02↓          | ND             | ND             | 2-I                   | ≤1-5                  | 1-I                   | 0.5-5                     | 0.12-5                             | 2-5                           | 4-I                            |  |  |
| CRE78          | <i>S. marcescens</i>       | <i>bla<sub>SHC</sub></i>         | Positive                       | Negative                              | 0.27↓                       | 0.22↓          | ND             | ND             | >8-R                  | >8-R                  | >4-R                  | 2-I                       | 0.12-5                             | 0.12-5                        | 0.25-5                         |  |  |
| CRE81          | <i>E. cloacae</i> complex  | Negative                         | Negative                       | ACT/MIR                               | 2.58↑                       | 0.63=          | ND             | ND             | 2-I                   | ≤1-5                  | 2-R                   | 1-5                       | 0.25-5                             | 1-5                           | 1-5                            |  |  |

|       |                            |                          |          |                             |       |       |    |    |      |      |      |        |        |        |        |
|-------|----------------------------|--------------------------|----------|-----------------------------|-------|-------|----|----|------|------|------|--------|--------|--------|--------|
| CRE83 | <i>K. pneumoniae</i>       | Negative                 | Negative | CTX-M9                      | 0.31↓ | 0↓    | ND | ND | ≤1-S | 2-I  | >4-R | 0.12-S | 0.06-S | 1-S    | 4-I    |
| CRE86 | <i>E. cloacae</i> complex  | Negative                 | Negative | ACT/MIR                     | 3.19† | 0↓    | ND | ND | ≤1-S | ≤1-S | 2-R  | 0.5-S  | 0.5-S  | 1-S    | 0.5-S  |
| CRE87 | <i>E. coli</i>             | <i>bla<sub>NDM</sub></i> | Positive | CTX-M-1, SHV (type-15 like) | 0.93≈ | 0↓    | ND | ND | >8-R | >8-R | >4-R | 8-R    | 32-R   | ≥256-R | ≥256-R |
| CRE88 | <i>E. cloacae</i> complex  | Negative                 | Negative | ACT/MIR                     | 0.02↓ | 0.02↓ | ND | ND | ≤1-S | ≤1-S | 4-R  | 1-S    | 1-S    | 1-S    | 2-S    |
| CRE89 | <i>C. freundii</i> complex | Negative                 | Negative | CMY II                      | 1.29≈ | 0.12↓ | ND | ND | ≤1-S | ≤1-S | 2-R  | 0.25-S | 0.12-S | 2-S    | 16-R   |
| CRE94 | <i>S. marcescens</i>       | <i>bla<sub>SHV</sub></i> | Positive | Negative                    | 0.17↓ | 0.09↓ | ND | ND | >8-R | 8-R  | 4-R  | 8-R    | 0.06-S | 0.12-S | 0.25-S |

pAmpC, plasmid-encoded AmpC; BMD, broth microdilution; ND, not done; S, susceptible; I, intermediate; R, resistant. † Isolates obtained from same patient.

\* Relative to susceptible control strains; RNA porin expression normalized to *rpoB* gene. Arrows show direction of change by 2-fold; ≈ indicates no change. # mCIM indeterminate but negative with MALDI-TOF-based assay. Grey shading identifies isolates that were called CRE by Vitek2 and/or disk diffusion but did not meet CRE definition with MicroScan testing; 8/10 isolates with grey shading tested had Microscan and Vitek2 results within 1 doubling dilution.

**Supplementary Table 6. Whole-genome sequencing statistics**

| Sample | Species                             | Raw reads | Preprocessed reads | Reference genome size (Mb) | X coverage (raw reads) |
|--------|-------------------------------------|-----------|--------------------|----------------------------|------------------------|
| CRE20  | <i>Citrobacter freundii</i> complex | 13621438  | 10894438           | 5.37                       | 254                    |
| CRE21  | <i>Citrobacter freundii</i> complex | 9564406   | 7713852            | 5.37                       | 178                    |
| CRE89  | <i>Citrobacter freundii</i> complex | 13308770  | 8630022            | 5.37                       | 248                    |
| CRE03  | <i>Enterobacter aerogenes</i>       | 9541404   | 7508428            | 5.28                       | 181                    |
| CRE09  | <i>Enterobacter aerogenes</i>       | 6462500   | 5028208            | 5.28                       | 122                    |
| CRE23  | <i>Enterobacter aerogenes</i>       | 9118030   | 7400354            | 5.28                       | 173                    |
| CRE27  | <i>Enterobacter aerogenes</i>       | 11193950  | 8940376            | 5.28                       | 212                    |
| CRE38  | <i>Enterobacter aerogenes</i>       | 9115142   | 7316246            | 5.28                       | 173                    |
| CRE39  | <i>Enterobacter aerogenes</i>       | 8060022   | 6031210            | 5.28                       | 153                    |
| CRE41  | <i>Enterobacter aerogenes</i>       | 12977462  | 8201800            | 5.28                       | 246                    |
| CRE77  | <i>Enterobacter aerogenes</i>       | 8545212   | 6796522            | 5.28                       | 162                    |
| CRE02  | <i>Enterobacter cloacae</i> complex | 13531886  | 8761830            | 5.60                       | 242                    |
| CRE06  | <i>Enterobacter cloacae</i> complex | 7377564   | 5602404            | 5.60                       | 132                    |
| CRE11  | <i>Enterobacter cloacae</i> complex | 8613630   | 6452940            | 5.60                       | 154                    |
| CRE33  | <i>Enterobacter cloacae</i> complex | 8360194   | 6470158            | 5.60                       | 149                    |
| CRE34  | <i>Enterobacter cloacae</i> complex | 6420570   | 5113068            | 5.60                       | 115                    |
| CRE36  | <i>Enterobacter cloacae</i> complex | 13144454  | 8457494            | 5.60                       | 235                    |
| CRE54  | <i>Enterobacter cloacae</i> complex | 7455674   | 5970668            | 5.60                       | 133                    |
| CRE65  | <i>Enterobacter cloacae</i> complex | 6499668   | 5309170            | 5.60                       | 116                    |
| CRE71  | <i>Enterobacter cloacae</i> complex | 9122156   | 7348270            | 5.60                       | 163                    |
| CRE73  | <i>Enterobacter cloacae</i> complex | 9670596   | 7753642            | 5.60                       | 173                    |
| CRE74  | <i>Enterobacter cloacae</i> complex | 8312990   | 6673682            | 5.60                       | 148                    |
| CRE81  | <i>Enterobacter cloacae</i> complex | 10786676  | 6973542            | 5.60                       | 193                    |
| CRE86  | <i>Enterobacter cloacae</i> complex | 9809582   | 6329290            | 5.60                       | 175                    |
| CRE88  | <i>Enterobacter cloacae</i> complex | 13698842  | 8538698            | 5.60                       | 245                    |
| CRE01  | <i>Escherichia coli</i>             | 10950698  | 8549600            | 5.59                       | 196                    |
| CRE14  | <i>Escherichia coli</i>             | 12461068  | 8080870            | 5.59                       | 223                    |
| CRE15  | <i>Escherichia coli</i>             | 8607294   | 6926228            | 5.59                       | 154                    |
| CRE16  | <i>Escherichia coli</i>             | 8904536   | 7173848            | 5.59                       | 159                    |
| CRE17  | <i>Escherichia coli</i>             | 12166272  | 7735208            | 5.59                       | 218                    |
| CRE42  | <i>Escherichia coli</i>             | 11185524  | 8868436            | 5.59                       | 200                    |
| CRE45  | <i>Escherichia coli</i>             | 15567734  | 9865222            | 5.59                       | 278                    |
| CRE50  | <i>Escherichia coli</i>             | 13599548  | 8634854            | 5.59                       | 243                    |
| CRE60  | <i>Escherichia coli</i>             | 7044844   | 5638744            | 5.59                       | 126                    |
| CRE75  | <i>Escherichia coli</i>             | 9623464   | 7529836            | 5.59                       | 172                    |

|       |                              |          |          |      |     |
|-------|------------------------------|----------|----------|------|-----|
| CRE87 | <i>Escherichia coli</i>      | 14558562 | 9381560  | 5.59 | 260 |
| CRE04 | <i>Klebsiella pneumoniae</i> | 6765882  | 5326958  | 5.68 | 119 |
| CRE07 | <i>Klebsiella pneumoniae</i> | 12140446 | 7919442  | 5.68 | 214 |
| CRE08 | <i>Klebsiella pneumoniae</i> | 12406860 | 8005792  | 5.68 | 218 |
| CRE10 | <i>Klebsiella pneumoniae</i> | 15118352 | 9446164  | 5.68 | 266 |
| CRE12 | <i>Klebsiella pneumoniae</i> | 12280676 | 8010072  | 5.68 | 216 |
| CRE13 | <i>Klebsiella pneumoniae</i> | 12545194 | 7958630  | 5.68 | 221 |
| CRE18 | <i>Klebsiella pneumoniae</i> | 11050234 | 7131952  | 5.68 | 195 |
| CRE22 | <i>Klebsiella pneumoniae</i> | 14653398 | 11638104 | 5.68 | 258 |
| CRE24 | <i>Klebsiella pneumoniae</i> | 9173260  | 5992434  | 5.68 | 162 |
| CRE25 | <i>Klebsiella pneumoniae</i> | 9606814  | 7768046  | 5.68 | 169 |
| CRE26 | <i>Klebsiella pneumoniae</i> | 11895904 | 7704752  | 5.68 | 209 |
| CRE28 | <i>Klebsiella pneumoniae</i> | 11307766 | 7251890  | 5.68 | 199 |
| CRE30 | <i>Klebsiella pneumoniae</i> | 10572724 | 6785704  | 5.68 | 186 |
| CRE31 | <i>Klebsiella pneumoniae</i> | 12827720 | 8271230  | 5.68 | 226 |
| CRE32 | <i>Klebsiella pneumoniae</i> | 9863376  | 7210062  | 5.68 | 174 |
| CRE37 | <i>Klebsiella pneumoniae</i> | 12438958 | 7990386  | 5.68 | 219 |
| CRE40 | <i>Klebsiella pneumoniae</i> | 10061548 | 8201864  | 5.68 | 177 |
| CRE43 | <i>Klebsiella pneumoniae</i> | 11872312 | 7534866  | 5.68 | 209 |
| CRE83 | <i>Klebsiella pneumoniae</i> | 12139628 | 7782548  | 5.68 | 214 |
| CRE05 | <i>Serratia marcescens</i>   | 10587920 | 6785166  | 5.11 | 207 |
| CRE35 | <i>Serratia marcescens</i>   | 11824004 | 7577772  | 5.11 | 231 |
| CRE44 | <i>Serratia marcescens</i>   | 10640256 | 6829166  | 5.11 | 208 |
| CRE49 | <i>Serratia marcescens</i>   | 11317462 | 7249150  | 5.11 | 221 |
| CRE72 | <i>Serratia marcescens</i>   | 12050524 | 7664790  | 5.11 | 236 |
| CRE78 | <i>Serratia marcescens</i>   | 11661294 | 7549384  | 5.11 | 228 |
| CRE94 | <i>Serratia marcescens</i>   | 12125614 | 7619854  | 5.11 | 237 |

---



**Supplementary Table 7. Single nucleotide variants (SNVs) of related CRE strains.**

| Isolate ID No. | Species              | Collection Date | Carbapenemase gene               | SNVs |
|----------------|----------------------|-----------------|----------------------------------|------|
| CRE50          | <i>E. coli</i>       | 2/1/2016        | Negative                         | 136  |
| CRE75          |                      | 8/16/2016       | Negative                         |      |
| CRE17          | <i>E. coli</i>       | 10/15/2014      | <i>bla<sub>NDM</sub></i>         | 1527 |
| CRE87          |                      | 11/13/2016      | <i>bla<sub>NDM</sub></i>         |      |
| CRE04          | <i>K. pneumoniae</i> | 4/6/2013        | Negative                         | 5    |
| CRE24          |                      | 12/28/2014      | Negative                         |      |
| CRE04          | <i>K. pneumoniae</i> | 4/6/2013        | Negative                         | 7    |
| CRE25          |                      | 12/31/2014      | Negative                         |      |
| CRE24          | <i>K. pneumoniae</i> | 12/28/2014      | Negative                         | 10   |
| CRE25          |                      | 12/31/2014      | Negative                         |      |
| CRE08          | <i>K. pneumoniae</i> | 8/2/2013        | <i>bla<sub>OXA-48 like</sub></i> | 1907 |
| CRE18          |                      | 10/19/2014      | <i>bla<sub>NDM</sub></i>         |      |
| CRE22          | <i>K. pneumoniae</i> | 11/19/2014      | Negative                         | 163  |
| CRE43          |                      | 12/24/2015      | <i>bla<sub>KPC</sub></i>         |      |
| CRE35          | <i>S. marcescens</i> | 9/2/2015        | <i>bla<sub>SME</sub></i>         | 30   |
| CRE49          |                      | 1/27/2016       | <i>bla<sub>SME</sub></i>         |      |
| CRE35          | <i>S. marcescens</i> | 9/2/2015        | <i>bla<sub>SME</sub></i>         | 40   |
| CRE94          |                      | 12/5/2016       | <i>bla<sub>SME</sub></i>         |      |
| CRE49          | <i>S. marcescens</i> | 1/27/2016       | <i>bla<sub>SME</sub></i>         | 40   |
| CRE94          |                      | 12/5/2016       | <i>bla<sub>SME</sub></i>         |      |
| CRE39          | <i>E. aerogenes</i>  | 10/30/2015      | Negative                         | 1258 |
| CRE41          |                      | 11/18/2015      | Negative                         |      |
| CRE09          | <i>E. aerogenes</i>  | 8/23/2013       | Negative                         | 176  |
| CRE77          |                      | 8/30/2016       | Negative                         |      |
| CRE54          | <i>E. cloacae</i>    | 3/1/2016        | Negative                         | 55   |
| CRE71          |                      | 8/25/2016       | Negative                         |      |

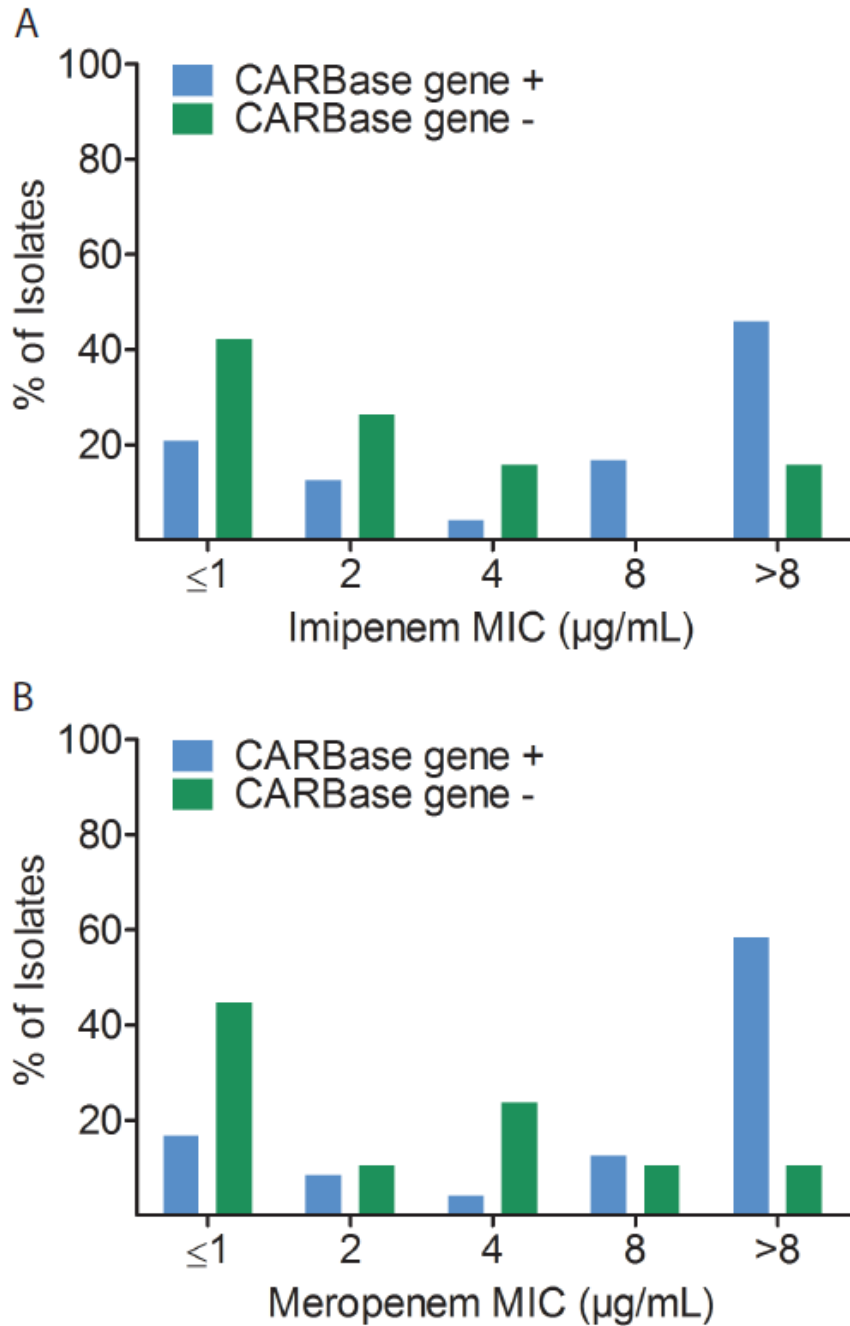

**Supplementary Figure 1. Distribution of imipenem and meropenem MICs in CRE isolates with and without a carbapenemase gene.** Bars show percentage of imipenem (A) and meropenem (B) MICs for carbapenemase gene-negative (CARBase gene -; green bars) and carbapenemase gene-positive (CARBase gene +; blue bars) CRE isolates. MICs were obtained with MicroScan.

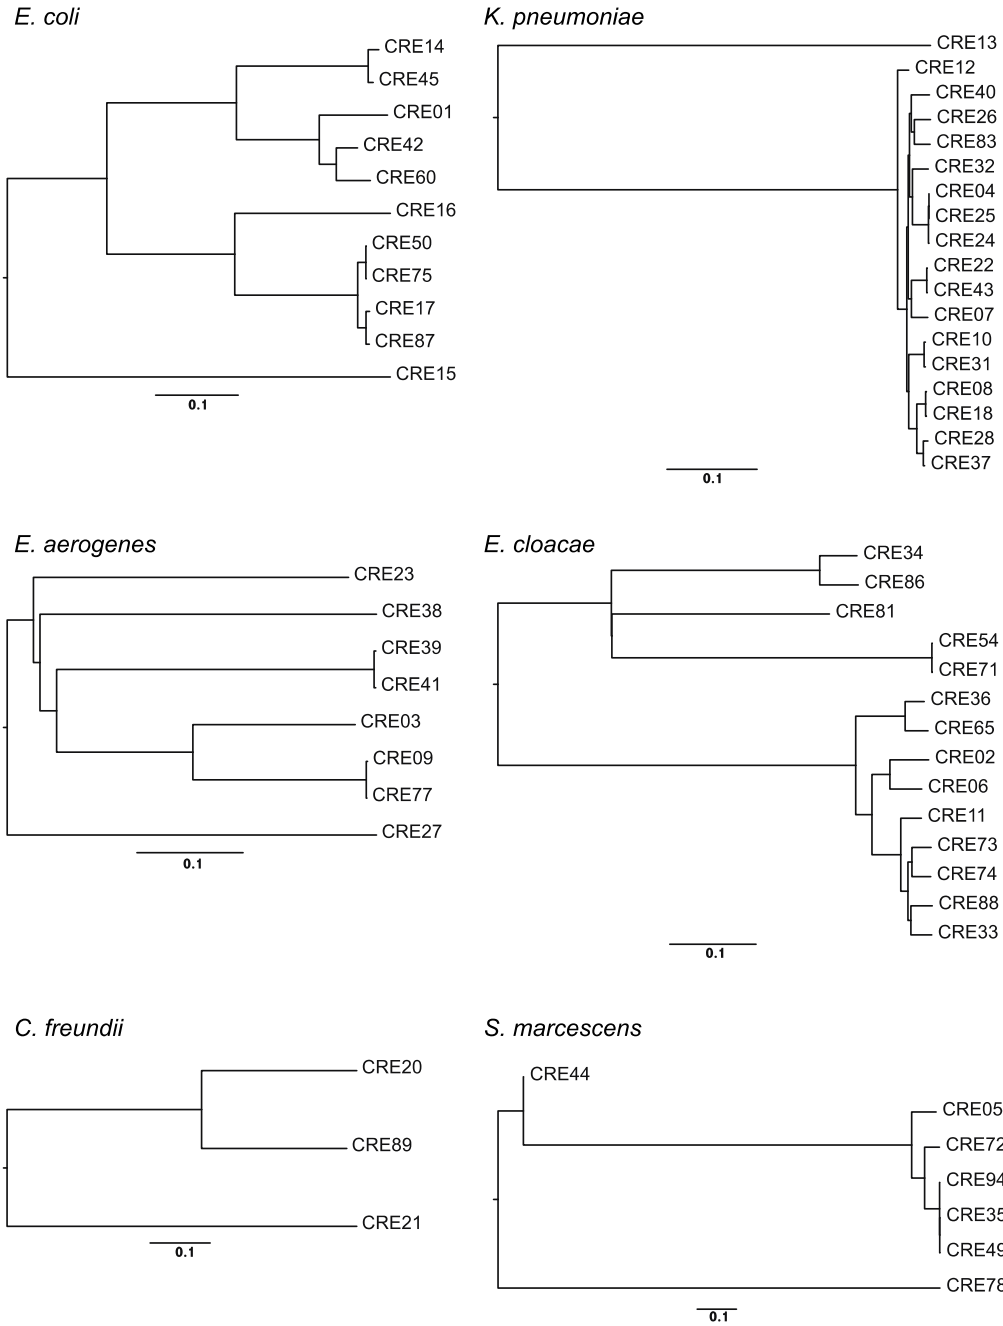

**Supplementary Figure 2. Phylogenetic trees for CRE isolates based on whole genome sequencing.** Midpoint-rooted approximate maximum likelihood phylogenetic

trees were computed from multiple sequence alignments of concatenated SNVs on a per-species basis. Scale bars show evolutionary distances.
